# Supplementary material for: Exposure to Elemental Carbon, Organic Carbon, Nitrate, and Sulfate Fractions of Fine Particulate Matter and Risk of Preterm Birth in New Jersey, Ohio, and Pennsylvania (2000–2005)
Source: PubMed Central journal article supplement (PMC4590756; doi:10.1289/ehp.1408953), 2015-04-24
Supplement: ehp.1408953.s001.acco.pdf [file ehp.1408953.s001.acco.pdf]

**Note to Readers:** *EHP* strives to ensure that all journal content is accessible to all readers. However, some figures and Supplemental Material published in *EHP* articles may not conform to 508 standards due to the complexity of the information being presented. If you need assistance accessing journal content, please contact [ehp508@niehs.nih.gov](mailto:ehp508@niehs.nih.gov). Our staff will work with you to assess and meet your accessibility needs within 3 working days.

## **Supplemental Material**

### **Exposure to Elemental Carbon, Organic Carbon, Nitrate, and Sulfate Fractions of Fine Particulate Matter and Risk of Preterm Birth in New Jersey, Ohio, and Pennsylvania (2000–2005)**

Kristen M. Rappazzo, Julie L. Daniels, Lynne C. Messer, Charles Poole, and Danelle T. Lobdell

#### **Table of Contents**

**Table S1.** Descriptive statistics for particulate matter species ( $\mu\text{g}/\text{m}^3$ ) exposure concentrations, averaged over all weeks of exposure.

**Figure S1:** Effect measure modification by race/ethnicity (left) and smoking status (right) for organic carbon. Models are adjusted for maternal education level, marital status, age at delivery, smoking status (race/ethnicity models), race/ethnicity (smoking status models), season of conception, maximum temperature and co-occurring ozone. Weeks where interaction terms have  $p < 0.05$  are: ExPTB: none; VPTB: smoking 1-8, 10-12, 14, 18-21, 24, 26-28, race/eth 2, 10, 20-21, 23-28; MPTB: smoking all, race/eth 1, 3, 4, 6, 10-11, 13-15, 17-24, 26, 31; LPTB: smoking 1-15, 16, race 1, 3-5, 7-16, 13-14, 27.

**Figure S2:** Effect measure modification by race/ethnicity (left) and smoking status (right) for  $\text{NO}_3$ . Models are adjusted for maternal education level, marital status, age at delivery, smoking status (race/ethnicity models), race/ethnicity (smoking status models), season of conception, maximum temperature and co-occurring ozone. Weeks where interaction terms have  $p < 0.05$  are:

ExPTB: none; VPTB: smoking 16, 22 race/eth 19; MPTB: none; LPTB: smoking 1-11, 13-14, 27, 16, race 2, 8, 10-14, 18-19.

**Figure S3:** Effect measure modification by race/ethnicity (left) and smoking status (right) for SO<sub>4</sub>. Models are adjusted for maternal education level, marital status, age at delivery, smoking status (race/ethnicity models), race/ethnicity (smoking status models), season of conception, maximum temperature and co-occurring ozone. Weeks where interaction terms have p<0.05 are: ExPTB: smoking 2-4, 20, race/eth 4; VPTB: none; MPTB: smoking 15; LPTB: smoking 2, 4, 7, 10, 12-14 race 15-22.

**Table S2:** Risk differences per 1,000,000 pregnancies with trimester end entire pregnancy length exposure windows. Exposure contrasts: 0.25µg/m<sup>3</sup> for elemental carbon (EC), 1µg/m<sup>3</sup> for organic carbon (OC), 1µg/m<sup>3</sup> for nitrates (NO<sub>3</sub>), and 1µg/m<sup>3</sup> for sulfates (SO<sub>4</sub>).

**Table S1.** Descriptive statistics for particulate matter species ( $\mu\text{g}/\text{m}^3$ ) exposure concentrations, averaged over all weeks of exposure.

| <b>Statistic</b>        | <b>ExPTB</b> | <b>VPTB</b> | <b>MPTB</b> | <b>LPTB</b> | <b>Term</b> |
|-------------------------|--------------|-------------|-------------|-------------|-------------|
| <b>Elemental Carbon</b> |              |             |             |             |             |
| Min                     | 0.07         | 0.06        | 0.04        | 0.04        | 0.02        |
| 25th                    | 0.37         | 0.37        | 0.36        | 0.35        | 0.35        |
| 50th                    | 0.51         | 0.51        | 0.49        | 0.48        | 0.47        |
| 75th                    | 0.72         | 0.71        | 0.69        | 0.67        | 0.65        |
| Max                     | 4.08         | 4.09        | 4.39        | 4.72        | 5.04        |
| Mean                    | 0.61         | 0.6         | 0.58        | 0.56        | 0.55        |
| SD                      | 0.37         | 0.36        | 0.35        | 0.34        | 0.32        |
| IQR                     | 0.34         | 0.34        | 0.33        | 0.32        | 0.31        |
| <b>Organic Carbon</b>   |              |             |             |             |             |
| Min                     | 0.20         | 0.17        | 0.12        | 0.10        | 0.06        |
| 25th                    | 1.12         | 1.11        | 1.09        | 1.07        | 1.06        |
| 50th                    | 1.61         | 1.59        | 1.56        | 1.52        | 1.51        |
| 75th                    | 2.33         | 2.31        | 2.26        | 2.20        | 2.18        |
| Max                     | 11.65        | 11.69       | 12.49       | 12.85       | 12.61       |
| Mean                    | 1.90         | 1.88        | 1.83        | 1.79        | 1.77        |
| SD                      | 1.14         | 1.12        | 1.10        | 1.07        | 1.05        |
| IQR                     | 1.20         | 1.22        | 1.22        | 1.21        | 1.09        |
| <b>Nitrate</b>          |              |             |             |             |             |
| Min                     | <0.01        | <0.01       | <0.01       | <0.01       | <0.01       |
| 25th                    | 0.47         | 0.47        | 0.47        | 0.46        | 0.45        |
| 50th                    | 1.43         | 1.43        | 1.40        | 1.39        | 1.36        |
| 75th                    | 2.75         | 2.73        | 2.68        | 2.65        | 2.63        |
| Max                     | 11.91        | 11.95       | 12.48       | 12.98       | 13.38       |
| Mean                    | 1.81         | 1.80        | 1.77        | 1.75        | 1.74        |
| SD                      | 1.58         | 1.57        | 1.55        | 1.54        | 1.53        |
| IQR                     | 2.28         | 2.26        | 2.22        | 2.19        | 2.18        |
| <b>Sulfate</b>          |              |             |             |             |             |
| Min                     | 0.90         | 0.90        | 0.84        | 0.80        | 0.69        |
| 25th                    | 2.81         | 2.79        | 2.79        | 2.77        | 2.78        |
| 50th                    | 4.48         | 4.46        | 4.51        | 4.51        | 4.54        |
| 75th                    | 7.7          | 7.66        | 7.76        | 7.78        | 7.82        |
| Max                     | 32.95        | 33.89       | 35.51       | 37.28       | 41.38       |
| Mean                    | 5.74         | 5.72        | 5.77        | 5.77        | 5.78        |
| SD                      | 3.95         | 3.95        | 3.99        | 4.00        | 3.98        |
| IQR                     | 4.75         | 4.78        | 4.91        | 4.98        | 4.93        |

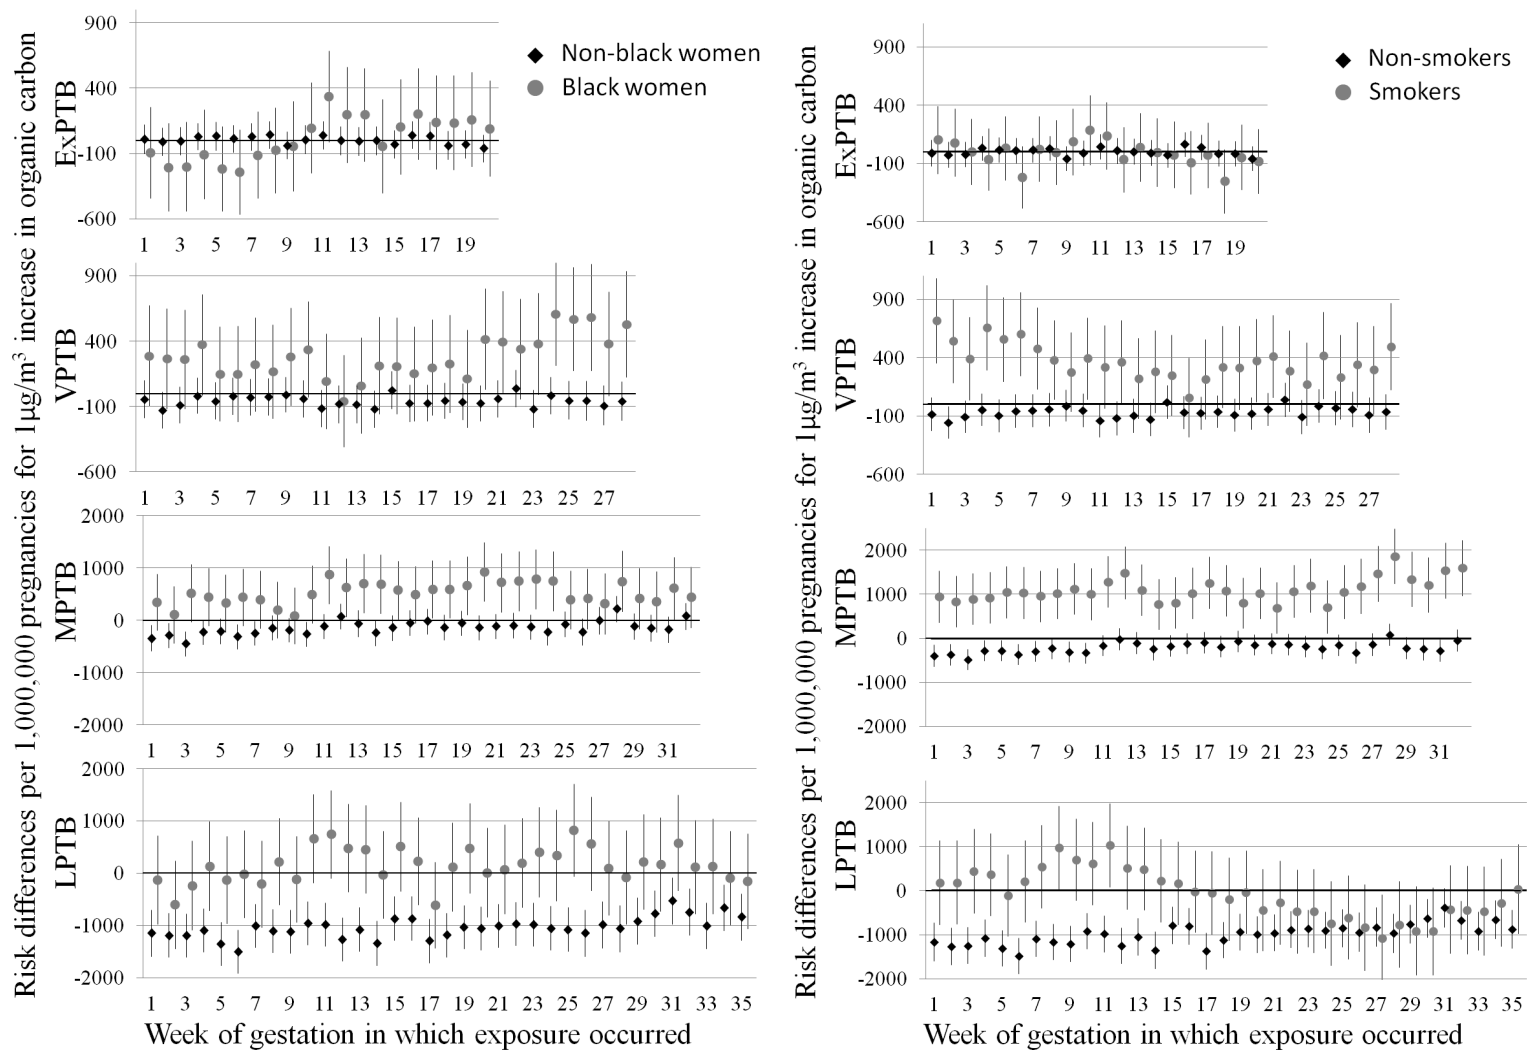

**Figure S1:** Effect measure modification by race/ethnicity (left) and smoking status (right) for organic carbon. Models are adjusted for maternal education level, marital status, age at delivery, smoking status (race/ethnicity models), race/ethnicity (smoking status models), season of conception, maximum temperature and co-occurring ozone. Weeks where interaction terms have  $p < 0.05$  are: ExPTB: none; VPTB: smoking 1-8, 10-12, 14, 18-21, 24, 26-28, race/eth 2, 10, 20-21, 23-28; MPTB: smoking all, race/eth 1, 3, 4, 6, 10-11, 13-15, 17-24, 26, 31; LPTB: smoking 1-15, 16, race 1, 3-5, 7-16, 13-14, 27.

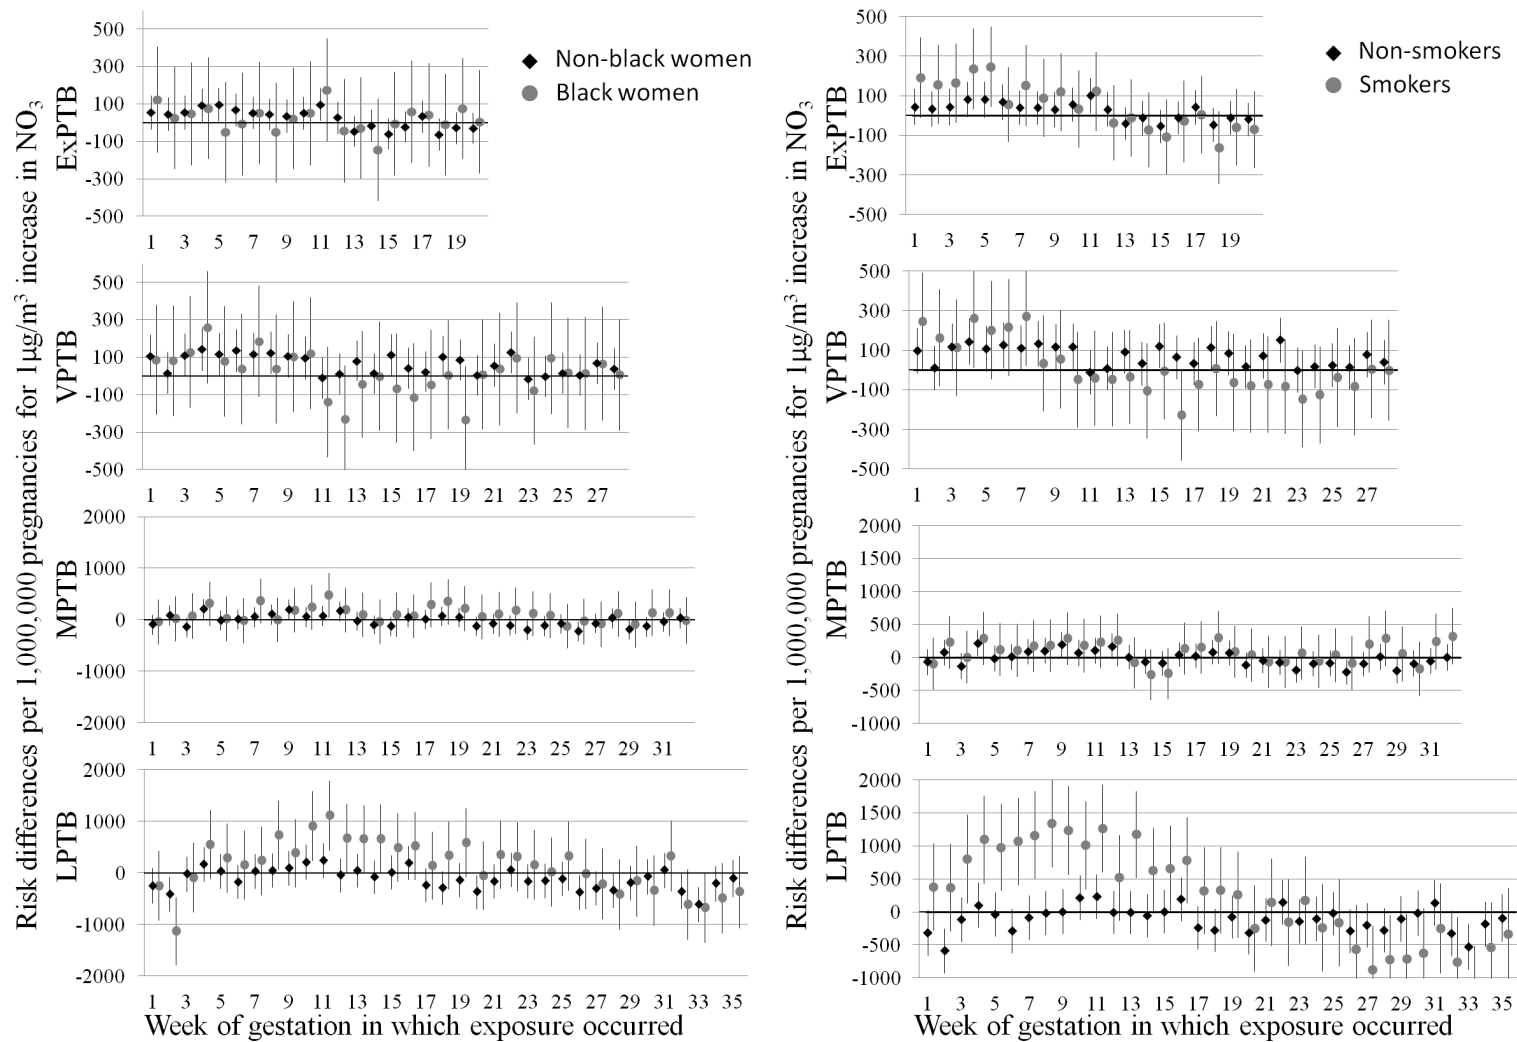

**Figure S2:** Effect measure modification by race/ethnicity (left) and smoking status (right) for  $\text{NO}_3$ . Models are adjusted for maternal education level, marital status, age at delivery, smoking status (race/ethnicity models), race/ethnicity (smoking status models), season of conception, maximum temperature and co-occurring ozone. Weeks where interaction terms have  $p < 0.05$  are: ExPTB: none; VPTB: smoking 16, 22 race/eth 19; MPTB: none; LPTB: smoking 1-11, 13-14, 27, 16, race 2, 8, 10-14, 18-19.

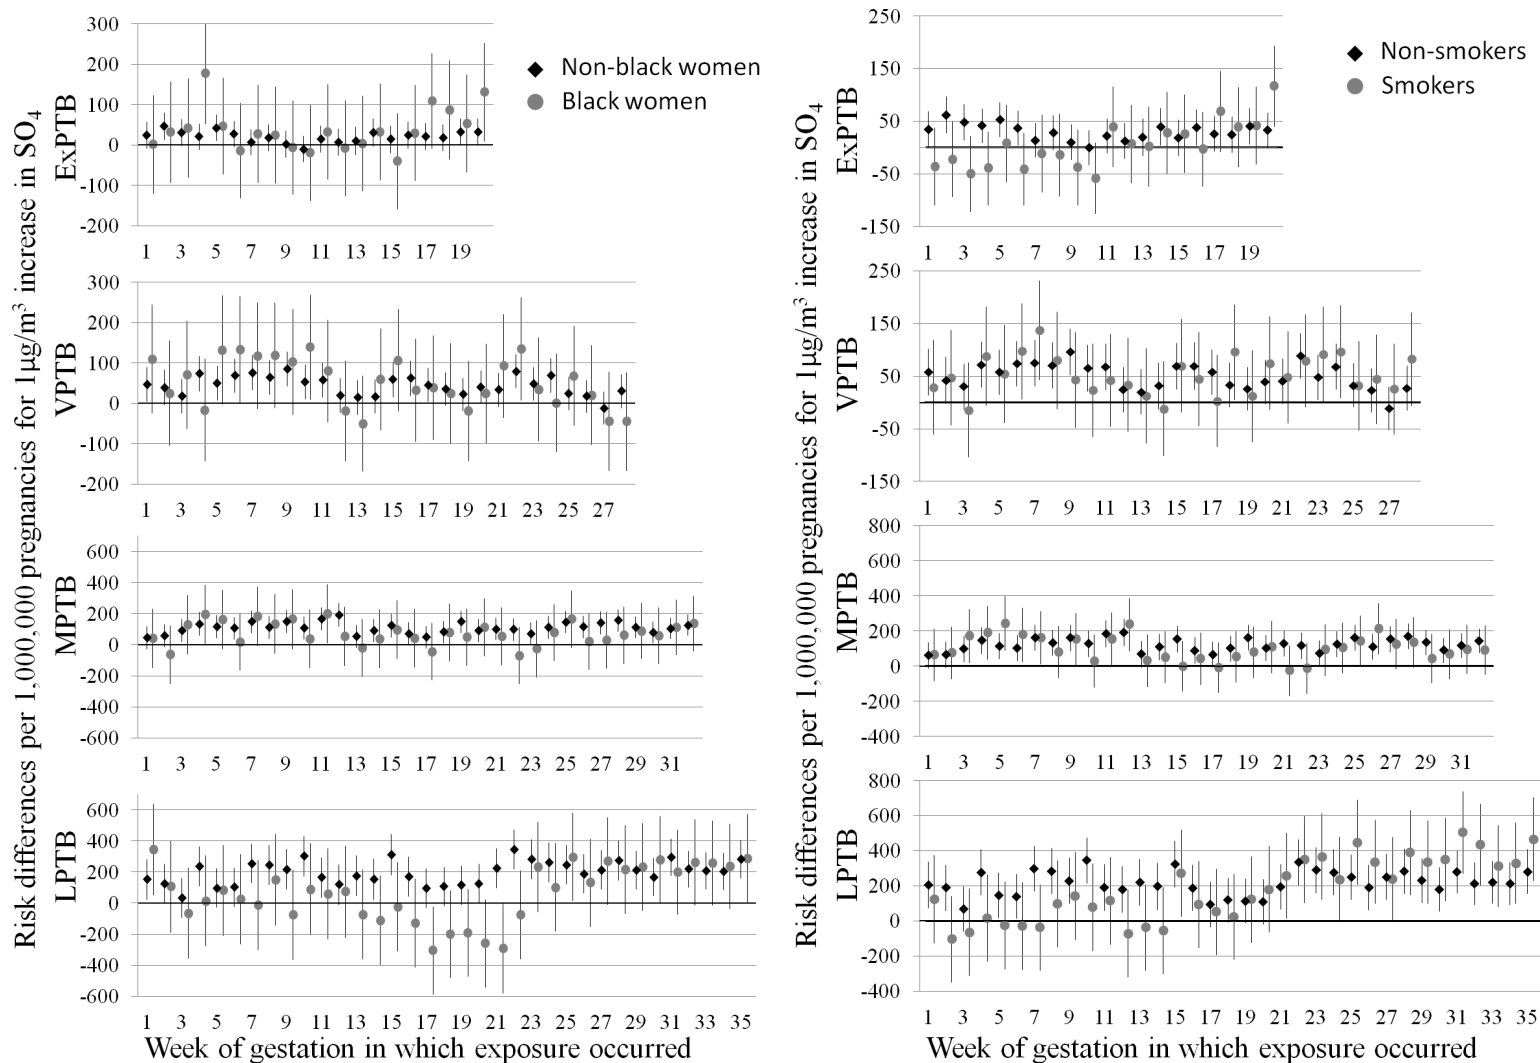

**Figure S3:** Effect measure modification by race/ethnicity (left) and smoking status (right) for  $\text{SO}_4$ . Models are adjusted for maternal education level, marital status, age at delivery, smoking status (race/ethnicity models), race/ethnicity (smoking status models), season of conception, maximum temperature and co-occurring ozone. Weeks where interaction terms have  $p < 0.05$  are: ExPTB: smoking 2-4, 20, race/eth 4; VPTB: none; MPTB: smoking 15; LPTB: smoking 2, 4, 7, 10, 12-14 race 15-22.

**Table S2:** Risk differences per 1,000,000 pregnancies with trimester end entire pregnancy length exposure windows. Exposure contrasts: 0.25 $\mu\text{g}/\text{m}^3$  for elemental carbon (EC), 1 $\mu\text{g}/\text{m}^3$  for organic carbon (OC), 1 $\mu\text{g}/\text{m}^3$  for nitrates ( $\text{NO}_3$ ), and 1 $\mu\text{g}/\text{m}^3$  for sulfates ( $\text{SO}_4$ ).

| <b>Exposure Window</b> | <b>EC, only</b>      | <b>EC, all species</b>      | <b>OC, only</b>      | <b>OC, all species</b>      |
|------------------------|----------------------|-----------------------------|----------------------|-----------------------------|
| ExPTB                  |                      |                             |                      |                             |
| Trimester 1            | 76 (-41, 192)        | 96 (-68, 259)               | 31 (-118, 180)       | -154 (-355, 48)             |
| Trimester 2            | -62 (-184, 60)       | -157 (-330, 15)             | -26 (-181, 130)      | 7 (-203, 217)               |
| Entire Pregnancy       | -230 (-441, -20)     | *                           | 31 (-166, 228)       | *                           |
| VPTB                   |                      |                             |                      |                             |
| Trimester 1            | 120 (-28, 268)       | 131 (-74, 336)              | -67 (-262, 129)      | -425 (-689, -162)           |
| Trimester 2            | 115 (-38, 268)       | 132 (-78, 343)              | -60 (-263, 142)      | -360 (-628, -91)            |
| Trimester 3            | 72 (-111, 254)       | 167 (-81, 415)              | 11 (-245, 268)       | -195 (-519, 129)            |
| Entire Pregnancy       | -268 (-509, -27)     | -239 (-543, 64)             | -64 (-317, 188)      | 57 (-280, 395)              |
| MPTB                   |                      |                             |                      |                             |
| Trimester 1            | 191 (-33, 414)       | 290 (-20, 599)              | -349 (-645, -52)     | -993 (-1397, -590)          |
| Trimester 2            | 88 (-140, 316)       | -8 (-323, 307)              | -244 (-551, 63)      | -500 (-911, -89)            |
| Trimester 3            | -52 (-285, 182)      | -75 (-404, 253)             | -87 (-424, 250)      | -225 (-678, 229)            |
| Entire Pregnancy       | -472 (-790, -153)    | -486 (-897, -74)            | -355 (-730, 20)      | -155 (-653, 342)            |
| LPTB                   |                      |                             |                      |                             |
| Trimester 1            | -464 (-890, -38)     | 334 (-252, 920)             | -2007 (-2581, -1433) | -3245 (-4016, -2474)        |
| Trimester 2            | -117 (-553, 319)     | 266 (-334, 865)             | -1727 (-2317, -1138) | -2969 (-3754, -2183)        |
| Trimester 3            | -336 (-780, 108)     | -233 (-848, 381)            | -954 (-1587, -320)   | -1442 (-2287, -597)         |
| Entire Pregnancy       | -1659 (-2240, -1078) | -905 (-1655, -154)          | -2289 (-3007, -1571) | -2175 (-3110, -1240)        |
| Exposure Window        | $\text{NO}_3$ , only | $\text{NO}_3$ , all species | $\text{SO}_4$ , only | $\text{SO}_4$ , all species |
| ExPTB                  |                      |                             |                      |                             |
| Trimester 1            | 134 (0, 269)         | 173 (27, 319)               | 77 (22, 132)         | 78 (18, 137)                |
| Trimester 2            | -10 (-150, 130)      | -33 (-183, 116)             | 70 (10, 129)         | 100 (35, 166)               |
| Entire Pregnancy       | 340 (111, 569)       | *                           | -44 (-169, 80)       | *                           |
| VPTB                   |                      |                             |                      |                             |
| Trimester 1            | 136 (-41, 312)       | 218 (29, 406)               | 208 (135, 280)       | 233 (153, 312)              |
| Trimester 2            | 40 (-131, 212)       | 112 (-70, 294)              | 171 (100, 243)       | 190 (111, 269)              |
| Trimester 3            | 229 (-11, 468)       | 253 (-6, 511)               | 1 (-94, 97)          | -5 (-110, 100)              |
| Entire Pregnancy       | 583 (323, 843)       | 523 (262, 784)              | 23 (-110, 155)       | 60 (-74, 194)               |
| MPTB                   |                      |                             |                      |                             |
| Trimester 1            | -55 (-318, 209)      | 156 (-130, 441)             | 364 (253, 475)       | 429 (306, 551)              |
| Trimester 2            | -329 (-590, -68)     | -257 (-536, 22)             | 275 (164, 387)       | 337 (214, 461)              |
| Trimester 3            | 206 (-91, 503)       | 245 (-73, 563)              | 104 (-11, 220)       | 139 (11, 267)               |
| Entire Pregnancy       | 392 (27, 758)        | 275 (-99, 649)              | 152 (-24, 328)       | 244 (62, 426)               |
| LPTB                   |                      |                             |                      |                             |
| Trimester 1            | 175 (-335, 686)      | 793 (242, 1345)             | 551 (337, 765)       | 897 (661, 1133)             |
| Trimester 2            | -519 (-1030, -8)     | -30 (-576, 517)             | 802 (584, 1020)      | 1118 (878, 1359)            |
| Trimester 3            | 222 (-325, 769)      | 443 (-142, 1028)            | 389 (177, 602)       | 574 (339, 808)              |
| Entire Pregnancy       | 1174 (476, 1872)     | 992 (273, 1711)             | 432 (108, 756)       | 816 (479, 1153)             |

\*Models did not converge.
